# Supplementary material
Source: MDPI journal article supplement (https://www.mdpi.com/2072-4292/15/15/3776)
Supplement: s1 [file s1]

# Supplementary Materials: A clustering approach for the analysis of InSAR time series: Application to the Bandung Basin (Indonesia)

Michelle Rygus<sup>1,\*</sup>, Alessandro Novellino<sup>2</sup>, Ekbal Hussain<sup>2</sup>, Fifik Syafiudin<sup>3</sup>, Heri Andreas<sup>4</sup>, Claudia Meisina<sup>1</sup>

<sup>1</sup>Department of Earth and Environmental Sciences, University of Pavia, Via Adolfo Ferrata 1, Pavia 27100, Italy

<sup>2</sup>British Geological Survey, Keyworth, Nottingham NG12 5GG, UK

<sup>3</sup>Geospatial Information Agency of Indonesia (Badan Informasi Geospasial), Jl. Ir. H. Juanda No. 193, Dago, Kecamatan Coblong, Kota Bandung, Jawa Barat 40135, Indonesia

<sup>4</sup>Department of Geodesy and Geomatics Engineering, Institute of Technology Bandung, Jalan Ganesha 10, Bandung 40132, Indonesia

\*Correspondence: [michelle.rygus01@universitadipavia.it](mailto:michelle.rygus01@universitadipavia.it)

# Supplementary Contents

Supplementary Figures S1–2

Supplementary Table S1

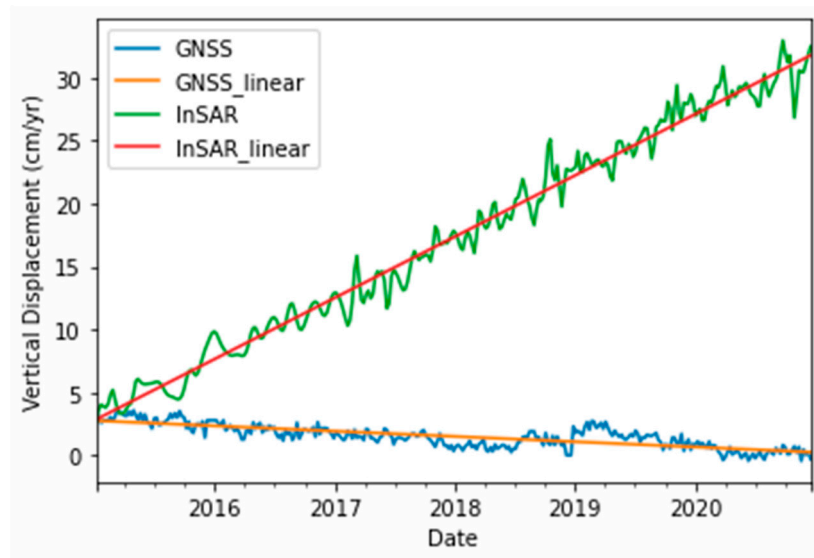

**Figure S1:** GNSS displacement time series in the vertical direction (blue line) compared with InSAR time series (green line) prior to the reference correction. The linear regression lines for the GNSS and the InSAR time series are shown by the orange and red lines, respectively.

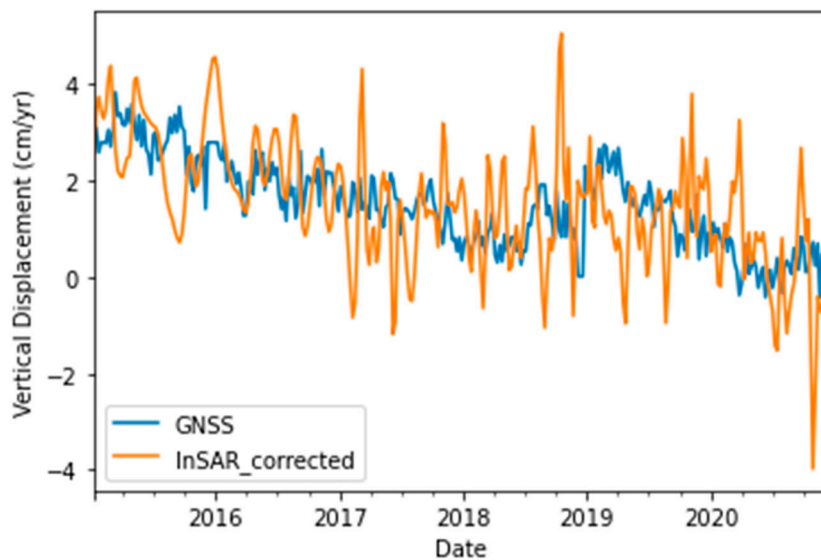

**Figure S2.** GNSS displacement time series in the vertical direction (blue line) compared with InSAR time series (orange line) following the reference correction.

**Table S1:** GNSS campaign data collected by students from the Institute of Technology Bandung, and the corresponding Sentinel-1 InSAR velocities, including the reference-corrected values that are used for validation.

| GNSS   |      |              |               |                        |                 |                  | Sentinel-1 InSAR                   |                                                        |
|--------|------|--------------|---------------|------------------------|-----------------|------------------|------------------------------------|--------------------------------------------------------|
| ID     | Year | Latitude (°) | Longitude (°) | Ellipsoidal Height (m) | $\Delta h$ (cm) | Velocity (cm/yr) | Velocity for 2016 to 2019* (cm/yr) | Reference-corrected velocity for 2016 to 2019* (cm/yr) |
| SAPN   | 2019 | 6.98990      | 107.68718     | 6,836,996              | -8.17           | -2.72            | 2.30                               | -2.92                                                  |
|        | 2016 | 6.98990      | 107.68718     | 6,837,813              |                 |                  |                                    |                                                        |
| BM 13  | 2019 | 7.00166      | 107.61802     | 6,832,371              | -10.58          | -3.53            | -2.74                              | -2.10                                                  |
|        | 2016 | 7.00166      | 107.61802     | 6,833,429              |                 |                  |                                    |                                                        |
| KOPO02 | 2019 | 6.98471      | 107.56316     | 6,821,098              | -25.01          | -8.34            | -7.31                              | -7.11                                                  |
|        | 2016 | 6.98471      | 107.56316     | 6,823,599              |                 |                  |                                    |                                                        |
| BM19   | 2019 | 6.96128      | 107.55969     | 6,919,394              | -40.1           | -13.37           | -10.16                             | -14.45                                                 |
|        | 2016 | 6.96128      | 107.55969     | 6,923,404              |                 |                  |                                    |                                                        |
| BM11   | 2019 | 6.96748      | 107.55294     | 6,870,303              | -47.46          | -15.82           | -11.18                             | -15.48                                                 |
|        | 2016 | 6.96748      | 107.55294     | 6,875,049              |                 |                  |                                    |                                                        |
| CMH1   | 2019 | 6.91225      | 107.54277     | 7,225,254              | -5.35           | -1.78            | -1.11                              | -2.56                                                  |
|        | 2016 | 6.91225      | 107.54277     | 7,225,789              |                 |                  |                                    |                                                        |
| P142   | 2019 | 6.96562      | 107.80781     | 7,012,924              | -5.11           | -1.70            | -1.64                              | -4.47                                                  |
|        | 2016 | 6.96562      | 107.80781     | 7,013,435              |                 |                  |                                    |                                                        |
| BM04   | 2019 | 7.04546      | 107.75320     | 6,961,698              | -16.96          | -5.65            | -1.48                              | -3.01                                                  |
|        | 2016 | 7.04546      | 107.75320     | 6,963,394              |                 |                  |                                    |                                                        |
| BM07   | 2019 | 7.01917      | 107.80643     | 6,929,788              | -14.03          | -4.68            | -2.67                              | -3.06                                                  |
|        | 2016 | 7.01917      | 107.80643     | 6,931,191              |                 |                  |                                    |                                                        |
| GDBG02 | 2019 | 6.96407      | 107.68793     | 6,849,703              | -29.87          | -9.96            | -10.09                             | -13.56                                                 |
|        | 2016 | 6.96407      | 107.68793     | 685,269                |                 |                  |                                    |                                                        |
| 2445   | 2019 | 7.00980      | 107.71909     | 686,504                | -9.53           | -3.18            | -2.71                              | -3.32                                                  |
|        | 2016 | 7.00980      | 107.71909     | 6,865,993              |                 |                  |                                    |                                                        |
| BM12   | 2019 | 7.03062      | 107.59366     | 6,891,121              | -17.07          | -5.69            | 0.01                               | -2.53                                                  |
|        | 2016 | 7.03062      | 107.59366     | 6,892,828              |                 |                  |                                    |                                                        |

\* Linear velocity adjusted to coincide with the same time period as the GNSS data
